# Supplementary material for: Core cross-linked star (CCS) polymers with tunable polarity: synthesis by RAFT dispersion polymerization, self-assembly and emulsification
Source: Royal Society of Chemistry journal article supplement (doi:10.1039/c3py21120g), 2013-01-01
Supplement: c3py21120g.pdf [file c3py21120g.pdf]

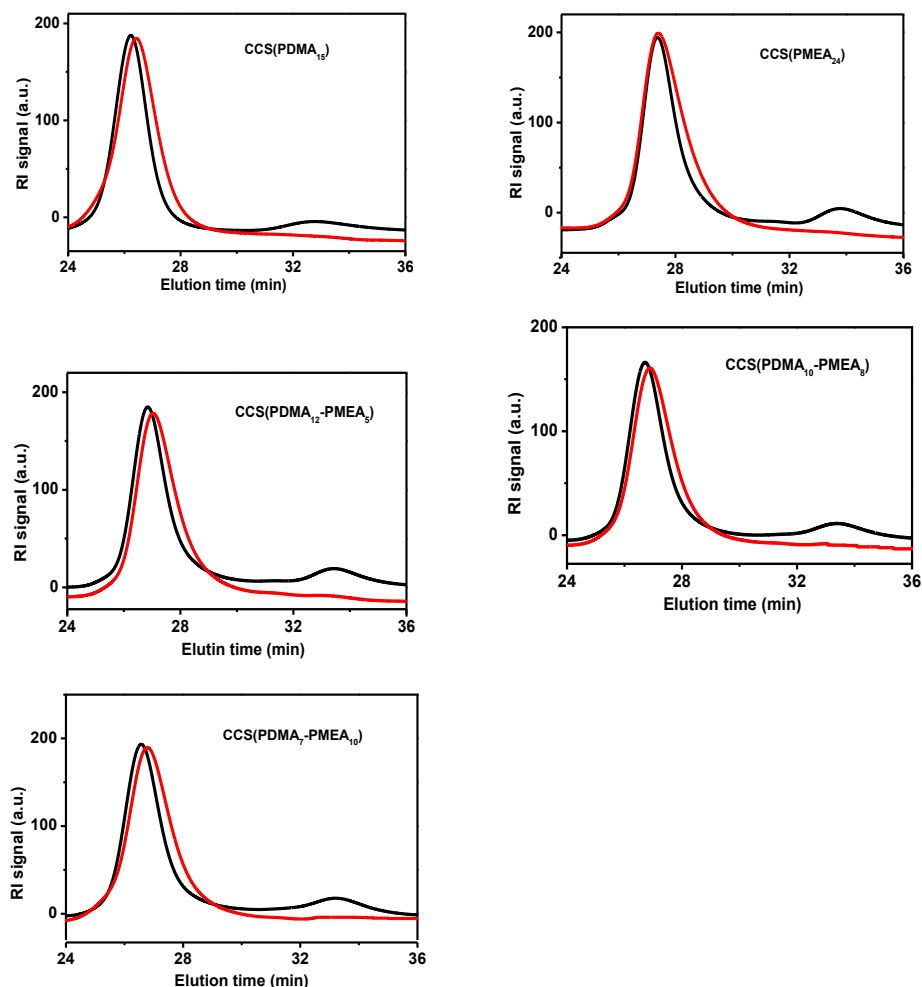

**Fig. S1** GPC traces of CCS polymers before (black) and after (red) purification.

**Table S1** Phase occupation for emulsions prepared using increasing volumetric fractions of toluene solutions of CCS polymers (0.5% w/v).<sup>a</sup>

|                                             | 10% <sup>b</sup> |        |       | 20% <sup>b</sup> |        |       | 30% <sup>b</sup> |        |       | 40% <sup>b</sup> |        |       | 50% <sup>b</sup> |        |       | 60% <sup>b</sup> |        |       |
|---------------------------------------------|------------------|--------|-------|------------------|--------|-------|------------------|--------|-------|------------------|--------|-------|------------------|--------|-------|------------------|--------|-------|
|                                             | Oil              | emuls. | water |
| CCS(PDMA <sub>15</sub> )                    | 0                | 19%    | 81%   | 0                | 32%    | 68%   | 0                | 45%    | 55%   | 0                | 57%    | 43%   | 0                | 72%    | 28%   | 34%              | 29%    | 37%   |
| CCS(PDMA <sub>12</sub> -PMEA <sub>5</sub> ) | 0                | 21%    | 79%   | 0                | 32%    | 68%   | 0                | 47%    | 53%   | 0                | 56%    | 44%   | 0                | 62%    | 38%   | 50%              | 50%    | 0     |
| CCS(PDMA <sub>10</sub> -PMEA <sub>8</sub> ) | 0                | 20%    | 80%   | 0                | 34%    | 66%   | 0                | 46%    | 54%   | 0                | 58%    | 42%   | 0                | 70%    | 30%   | 46%              | 54%    | 0     |
| CCS(PDMA <sub>7</sub> -PMEA <sub>10</sub> ) | 0                | 19%    | 81%   | 0                | 30%    | 70%   | 0                | 45%    | 55%   | 0                | 54%    | 46%   | 0                | 68%    | 32%   | 0                | 81%    | 29%   |
| CCS(PMEA <sub>24</sub> )                    | 14%              | 0      | 86%   | 23%              | 0      | 77%   | 33%              | 0      | 67%   | 43%              | 0      | 57%   | 31%              | 69%    | 0     | 47%              | 53%    | 0     |

<sup>a</sup>The volume percentage of oil, emulsion and water phase in the samples was measured 1 day after preparation <sup>b</sup>Volumetric fraction of toluene solutions of CCS polymers when preparing the emulsion samples.

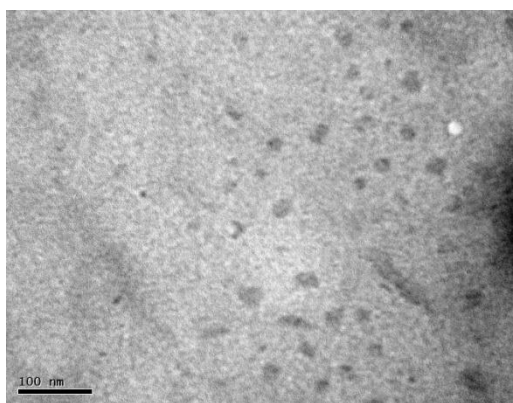

**Fig. S2** TEM image of particles of CCS(PDMA<sub>12</sub>-PMEA<sub>5</sub>) self-assembled in water at a concentration of 1 wt%.

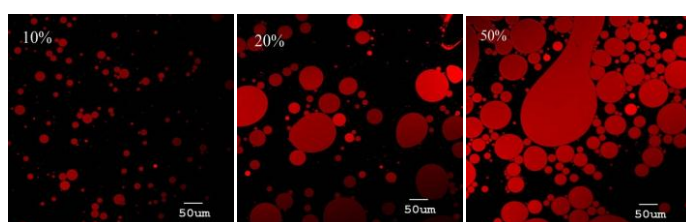

**Fig. S3** CLSM images of emulsions prepared using 10%, 20% and 50% volumetric fractions of toluene solution of CCS(PDMA<sub>15</sub>) (0.5%, w/v). The oil phase is stained with Nile red.

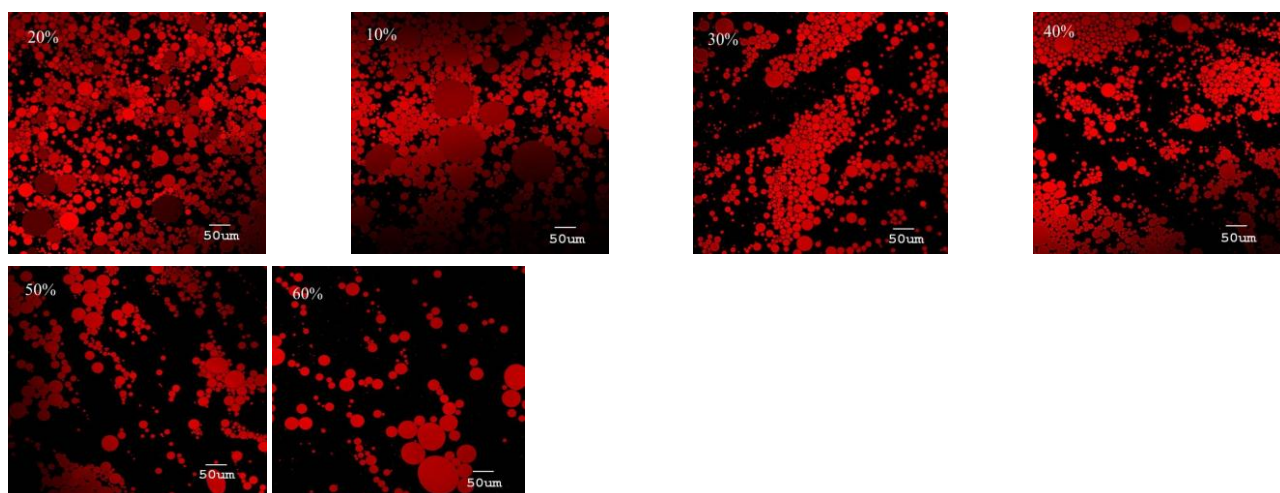

**Fig. S4** CLSM images of emulsions prepared using 10-60% volumetric fractions of toluene solution of CCS(PDMA<sub>12</sub>-PMEA<sub>5</sub>) (0.5%, w/v). The oil phase is stained with Nile red.

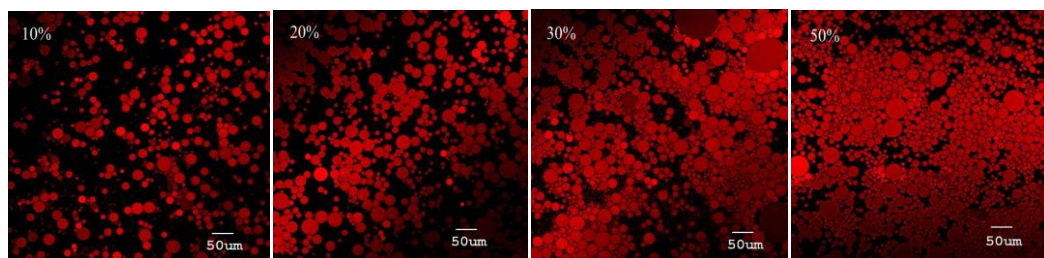

**Fig. S5** CLSM images of emulsions prepared using 10%, 20%, 30%, 50% volumetric fractions of toluene solution of CCS(PDMA<sub>10</sub>-PMEA<sub>8</sub>) (0.5%, w/v). The oil phase is stained with Nile red.

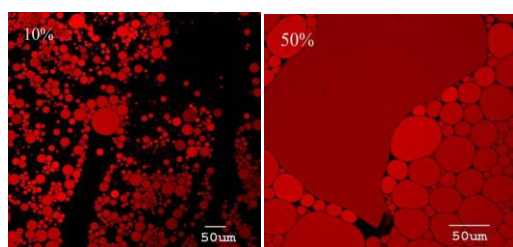

**Fig. S6** CLSM images of emulsions prepared using 10% and 50% volumetric fractions of toluene solution of CCS(PDMA<sub>7</sub>-PMEA<sub>10</sub>) (0.5%, w/v). The oil phase is stained with Nile red.

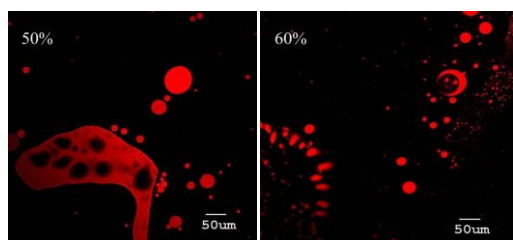

**Fig. S7** CLSM images of emulsions prepared using 50% and 60% volumetric fractions of toluene solution of CCS(PMEA<sub>24</sub>) (0.5%, w/v). The oil phase is stained with Nile red.
